# Supplementary material for: Agouti Revisited: Transcript Quantification of the ASIP Gene in Bovine Tissues Related to Protein Expression and Localization
Source: PubMed Central journal article supplement (PMC3328439; doi:10.1371/journal.pone.0035282), 2012-04-17

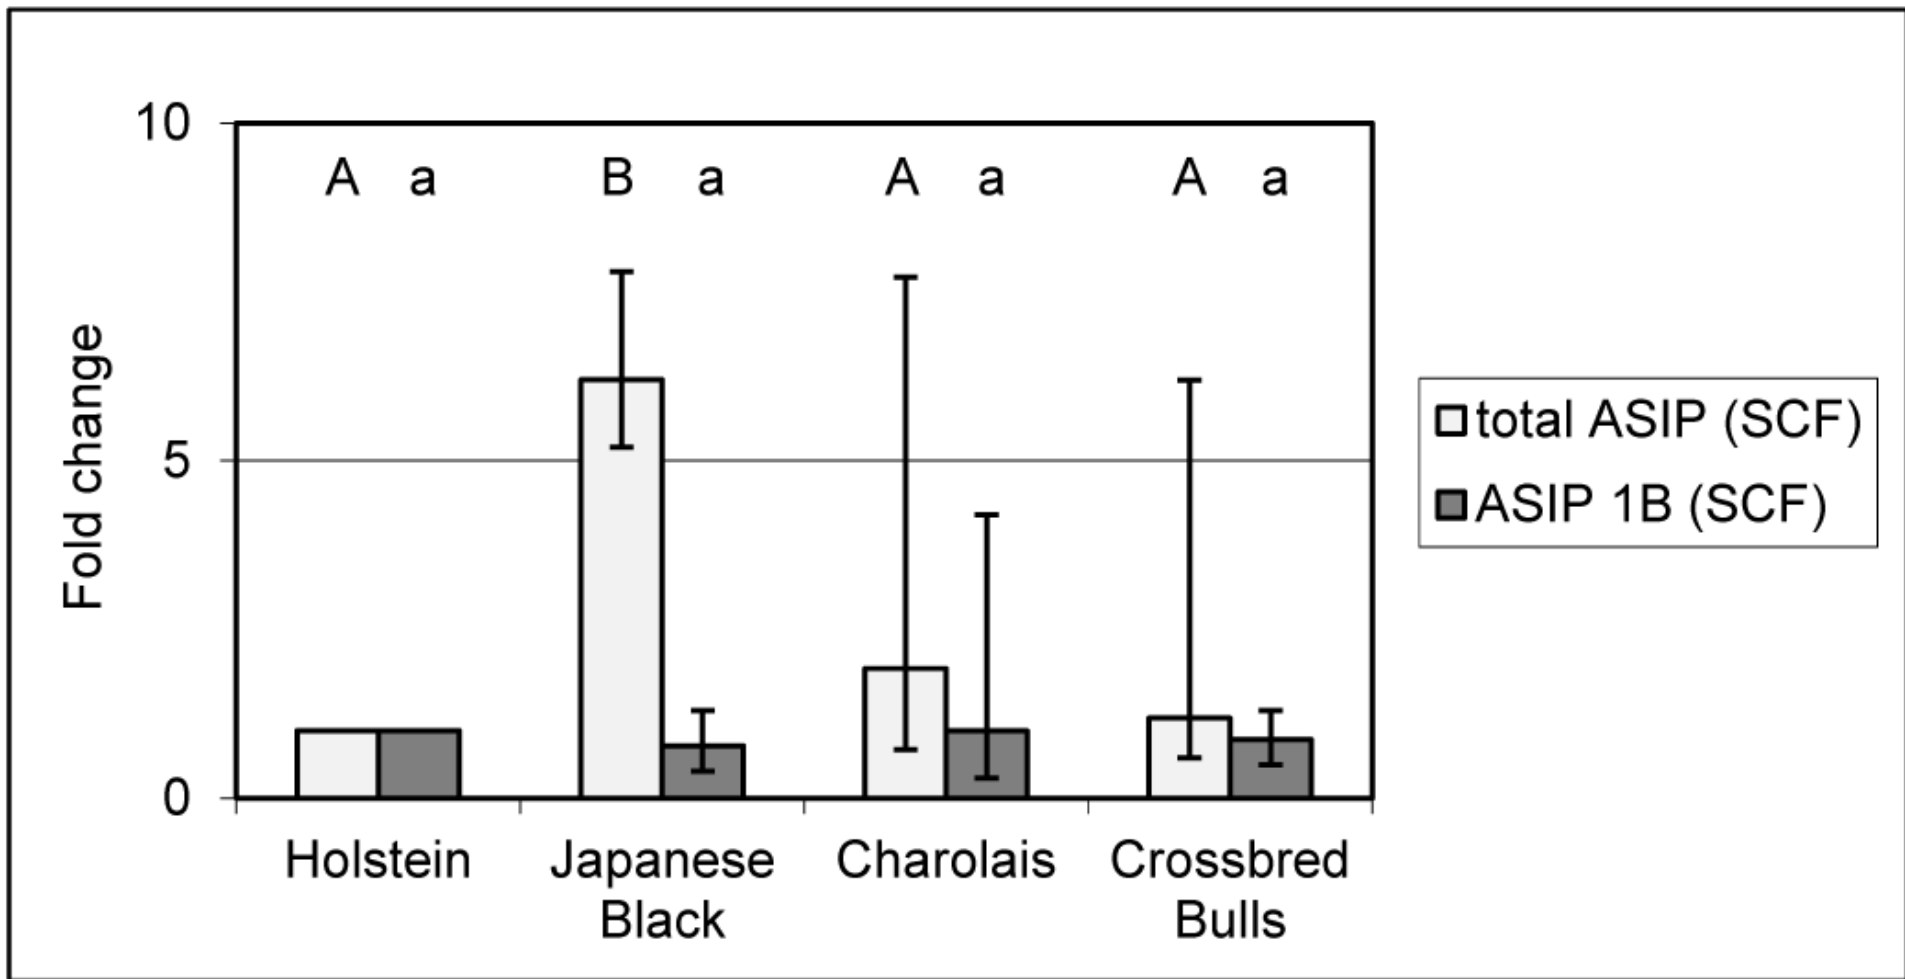

Supplement: pone.0035282.s001.pdf [file pone.0035282.s001.pdf]
