# Supplementary material for: Agouti Revisited: Transcript Quantification of the ASIP Gene in Bovine Tissues Related to Protein Expression and Localization
Source: PubMed Central journal article supplement (PMC3328439; doi:10.1371/journal.pone.0035282), 2012-04-17
Supplement: pone.0035282.s004.pdf [file pone.0035282.s004.pdf]

**Table S1. L1-BT insertion at the ASIP locus, expression of transcript 2C and genotypes at the coat color locus MC1R in different cattle breeds and crosses.**

| Breed/Cross                                         | Sample | L1-BT insertion   |               | MC1R genotype <sup>2</sup>     |
|-----------------------------------------------------|--------|-------------------|---------------|--------------------------------|
|                                                     |        | genomic detection | expression 2C |                                |
| Holstein                                            | #1     | no                | no            | E <sup>D</sup> /E <sup>D</sup> |
|                                                     | #2     | no                | no            | E <sup>D</sup> /E <sup>D</sup> |
|                                                     | #3     | no                | no            | E <sup>D</sup> /E <sup>D</sup> |
|                                                     | #4     | no                | no            | E <sup>D</sup> /E <sup>D</sup> |
|                                                     | #5     | no                | no            | E <sup>D</sup> /E <sup>D</sup> |
| Japanese Black                                      | #1     | heterozygous      | yes           | E/E <sup>3</sup>               |
|                                                     | #2     | heterozygous      | yes           | E <sup>D</sup> /E <sup>D</sup> |
|                                                     | #3     | heterozygous      | yes           | E/E <sup>3</sup>               |
|                                                     | #4     | heterozygous      | yes           | E <sup>D</sup> /E <sup>D</sup> |
|                                                     | #5     | heterozygous      | yes           | E/E <sup>3</sup>               |
|                                                     | #6     | heterozygous      | yes           | E <sup>D</sup> /E <sup>D</sup> |
| Charolais                                           | #1     | no                | no            | E <sup>D</sup> /e              |
|                                                     | #2     | heterozygous      | yes           | E <sup>D</sup> /e              |
|                                                     | #3     | no                | no            | E <sup>D</sup> /e              |
|                                                     | #4     | no                | no            | e/e                            |
|                                                     | #5     | heterozygous      | yes           | E <sup>D</sup> /e              |
|                                                     | #6     | no                | no            | E <sup>D</sup> /e              |
| Crossbred<br>(Jap. Black x diverse)                 | #1     | no <sup>1</sup>   | no            | n/d                            |
|                                                     | #2     | no                | no            | E/E <sup>D</sup>               |
|                                                     | #3     | no                | no            | E/E                            |
|                                                     | #4     | heterozygous      | yes           | E/E <sup>3</sup>               |
|                                                     | #5     | no                | no            | E <sup>D</sup> /e              |
| Charolais x Holstein<br>(F <sub>2</sub> -offspring) | #1     | no                |               |                                |
|                                                     | #2     | no                |               |                                |
|                                                     | #3     | no                | n/d           | n/d                            |
|                                                     | #4     | no                |               |                                |
|                                                     | #5     | no                |               |                                |
| Aberdeen Angus                                      | #1     | heterozygous      |               |                                |
|                                                     | #2     | no                |               |                                |
|                                                     | #3     | heterozygous      | n/d           | n/d                            |
|                                                     | #4     | heterozygous      |               |                                |
|                                                     | #5     | heterozygous      |               |                                |
| German Black and White                              | #1     | no                |               |                                |
|                                                     | #2     | no                |               |                                |
|                                                     | #3     | no                | n/d           | n/d                            |
|                                                     | #4     | no                |               |                                |
|                                                     | #5     | no                |               |                                |
| Galloway                                            | #1     | heterozygous      |               |                                |
|                                                     | #2     | heterozygous      |               |                                |
|                                                     | #3     | no                | n/d           | n/d                            |
|                                                     | #4     | heterozygous      |               |                                |
|                                                     | #5     | heterozygous      |               |                                |
|                                                     | #6     | no                |               |                                |
| White Blue Belgian                                  | #1     | no                | n/d           | n/d                            |
|                                                     | #2     | no                |               |                                |

n/d: not determined

<sup>1</sup>: A specific amplicon was received for the 5' junction, but no 3' junction and no expression of transcript 2C was observed.

<sup>2</sup>: MC1R genotypes according to [26]; E: wild type; E<sup>D</sup> and e: mutant alleles

<sup>3</sup>: These animals possessed the proposed genetic requirements for brindle coat color (at least one MC1R wild type allele and expression of L1-BT-derived ASIP transcript 2C [12]) but did not display the phenotype.
